## AUTHOR CORRECTION

**Engel, U., Oezbek, S., Engel, R., Petri, B., Lottspeich, F. and Holstein, T. W.** (2002). Nowa, a novel protein with minicollagen Cys-rich domains, is involved in nematocyst formation in *Hydra*. **115**, 3923-3934.

In both the on-line and print versions of this paper, the second and third authors' names are incorrect. The correction version is shown below:

**Ulrike Engel, Suat Özbek, Ruth Streitwolf-Engel, Barbara Petri, Friedrich Lottspeich and Thomas W. Holstein**

In addition, the nucleotide sequence for the Nowa cDNA was shown with an incorrect GenBank accession number. The correct GenBank accession number is AF539862.
